# Supplementary material
Source: PubMed Central journal article supplement (PMC1150816)

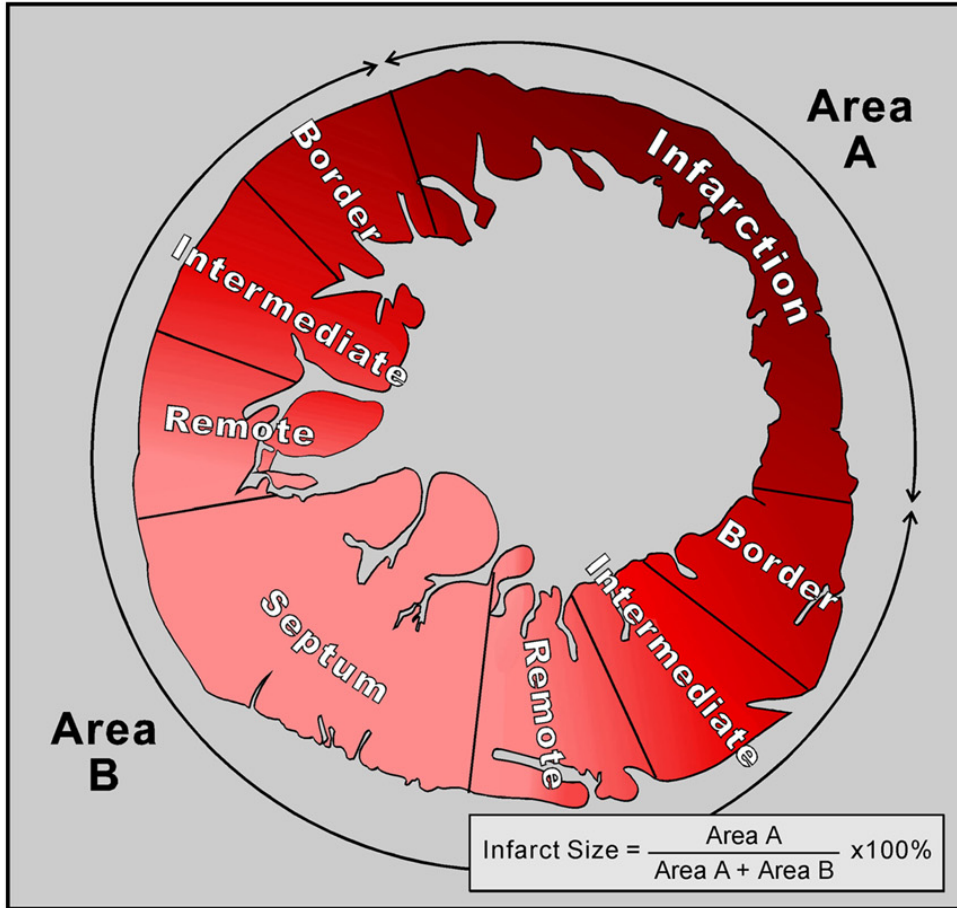

Supplement: pnas_0500169102_1.pdf [file pnas_0500169102_1.pdf]

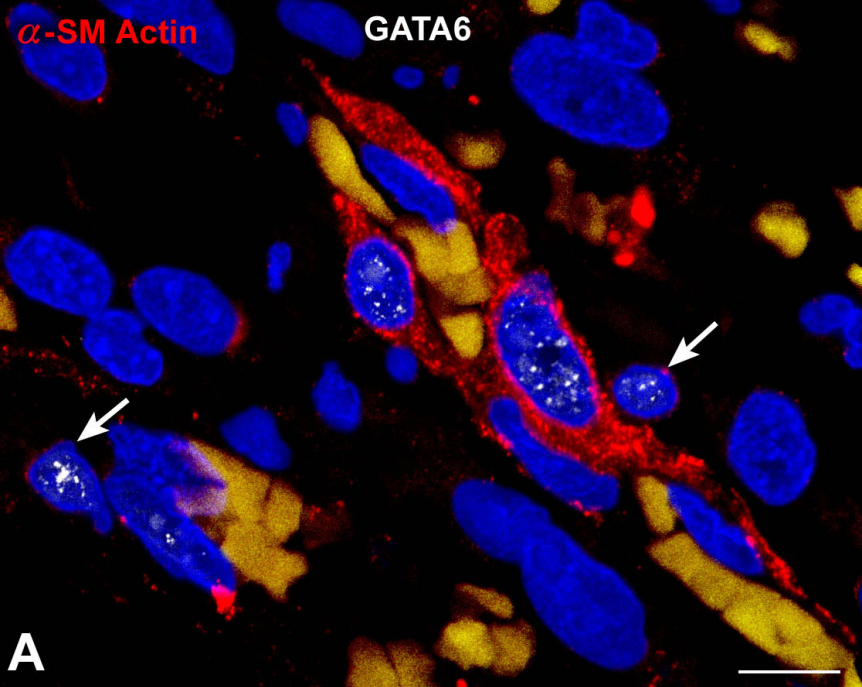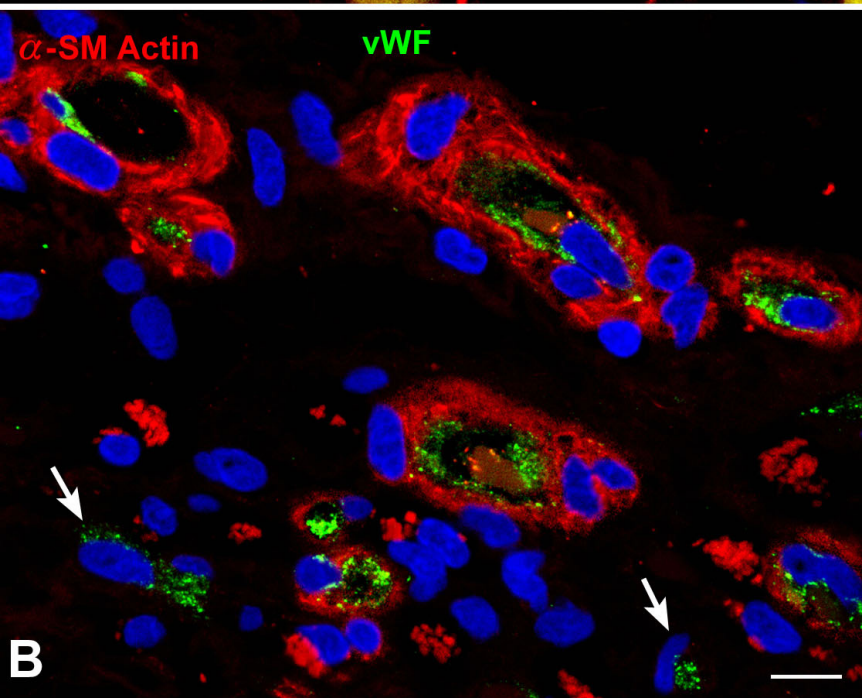

Supplement: pnas_0500169102_10.pdf [file pnas_0500169102_10.pdf]

## SMC Progenitors and Precursors

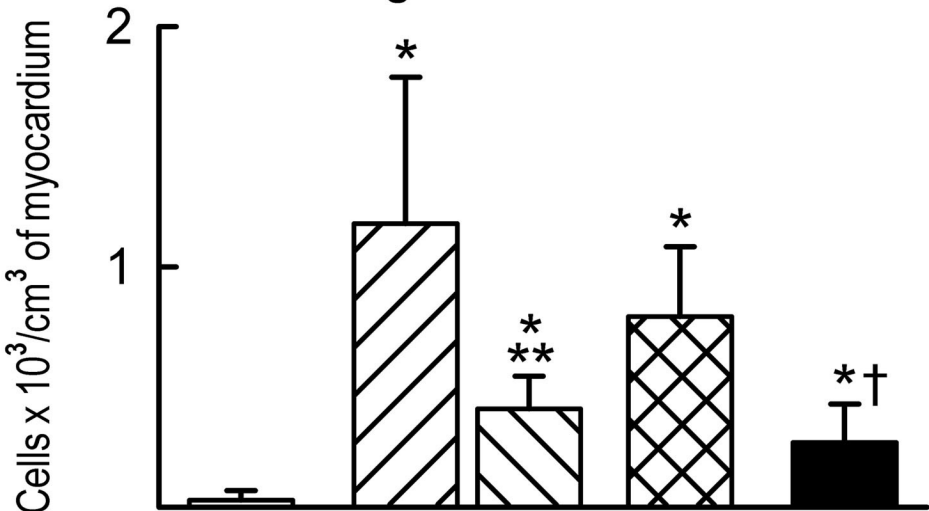

## EC Progenitors and Precursors

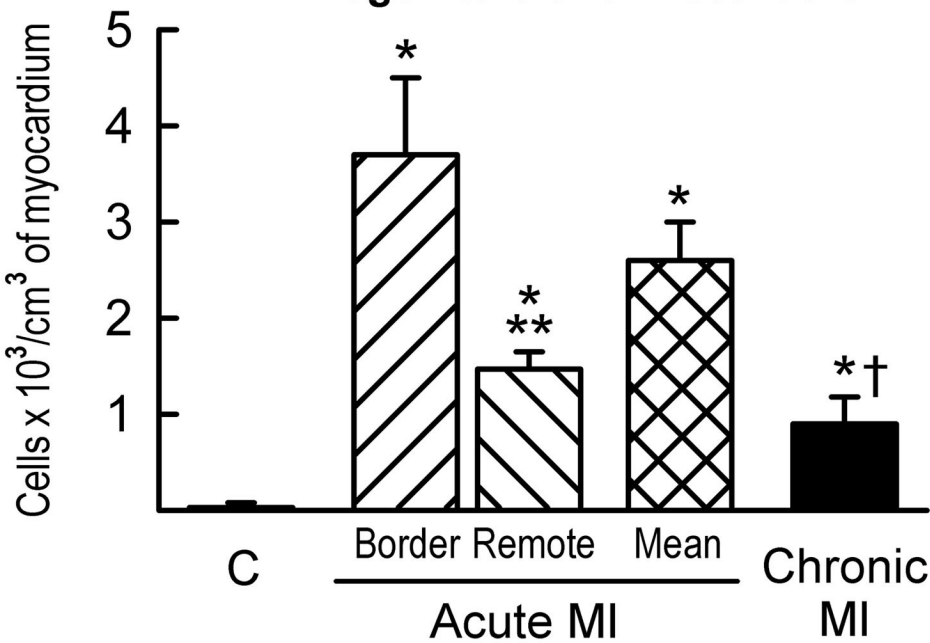

Supplement: pnas_0500169102_11.pdf [file pnas_0500169102_11.pdf]

TERT MCM5

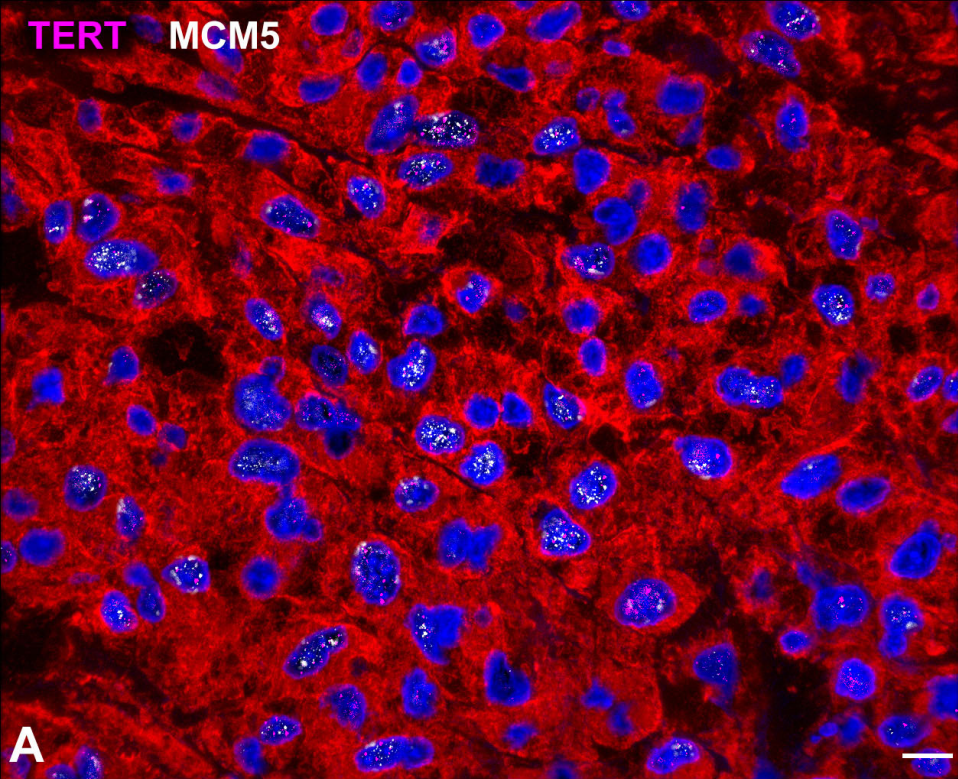

A

MEF2C Connexin43

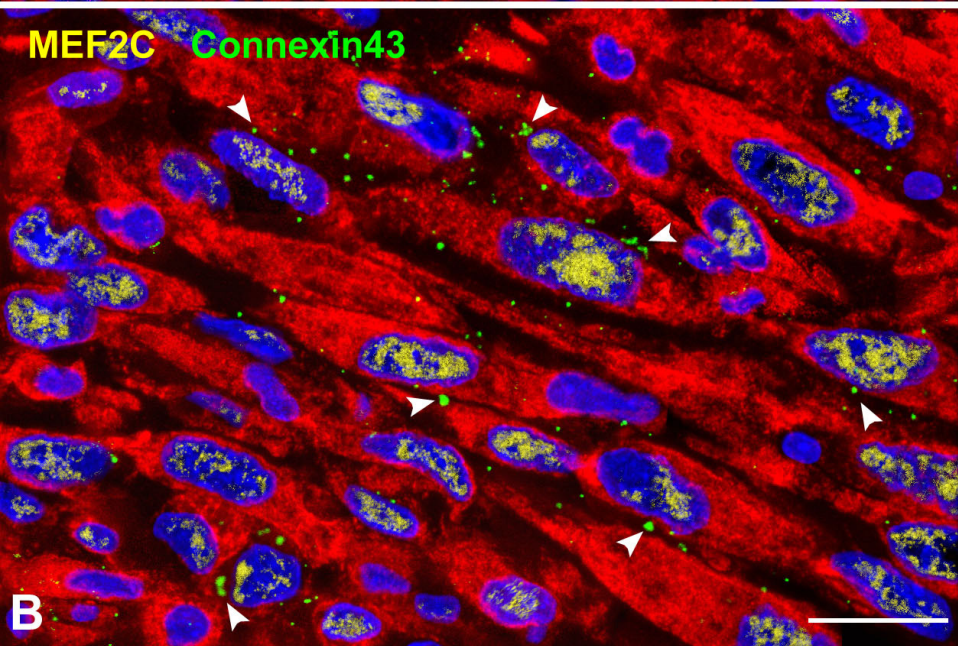

B

Supplement: pnas_0500169102_12.pdf [file pnas_0500169102_12.pdf]

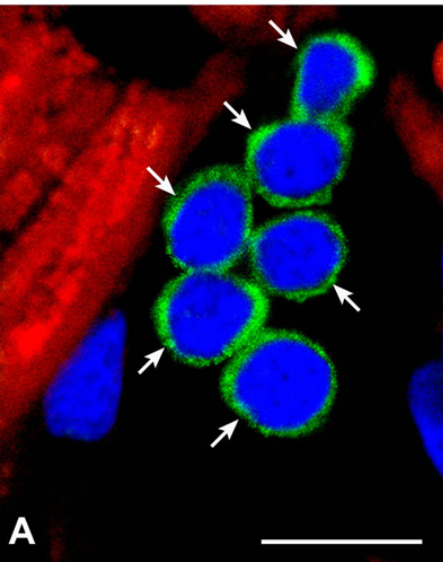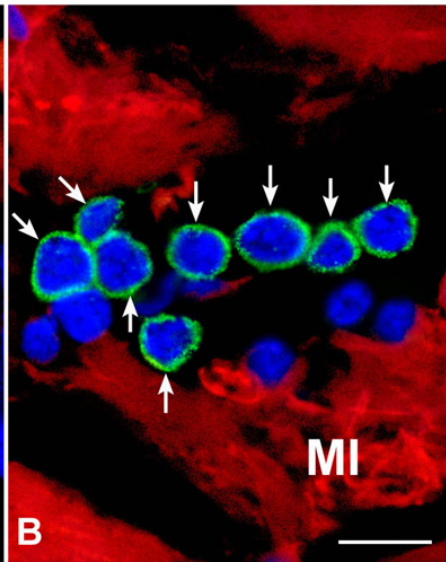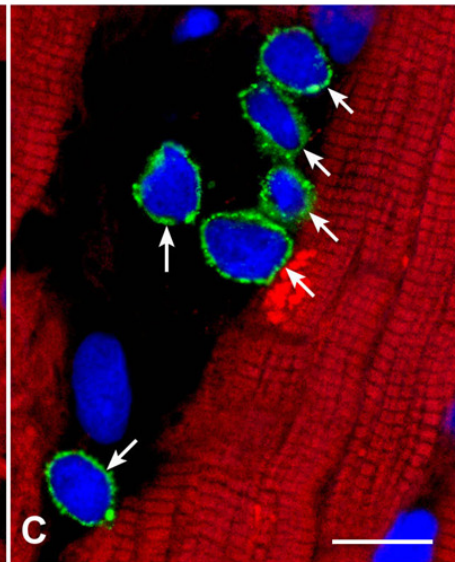

Supplement: pnas_0500169102_2.pdf [file pnas_0500169102_2.pdf]

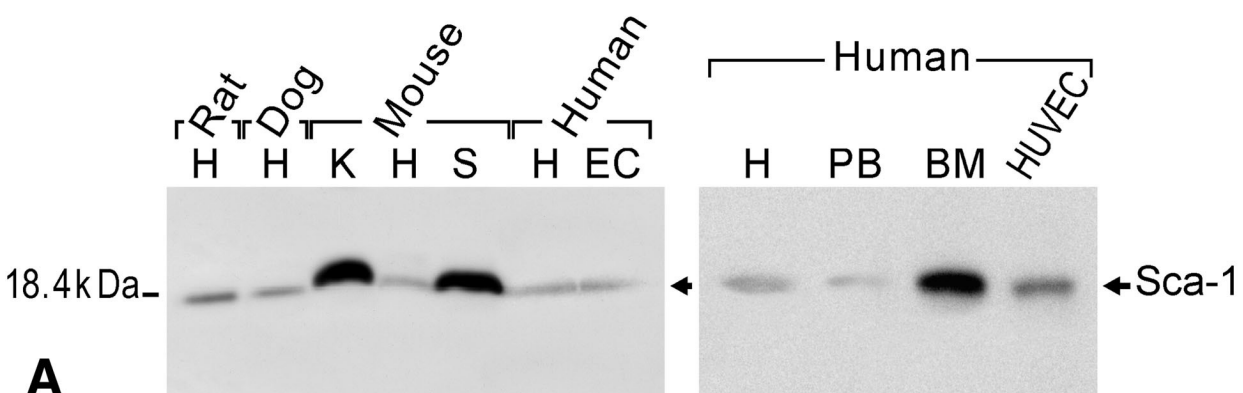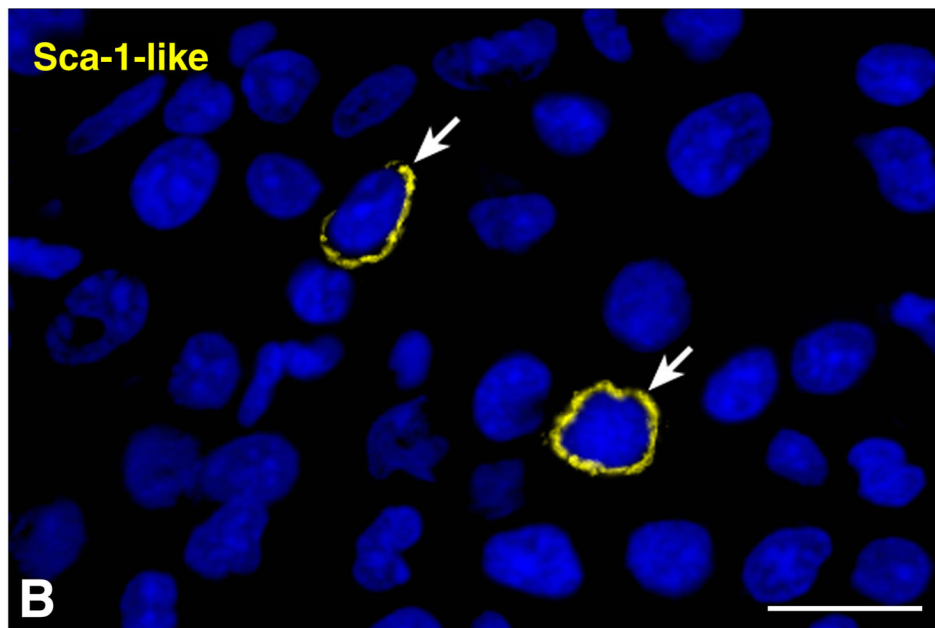

Supplement: pnas_0500169102_3.pdf [file pnas_0500169102_3.pdf]

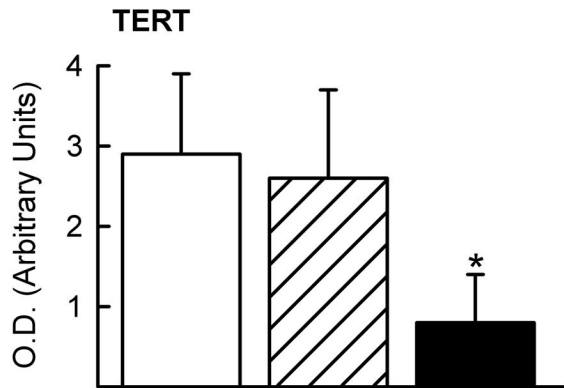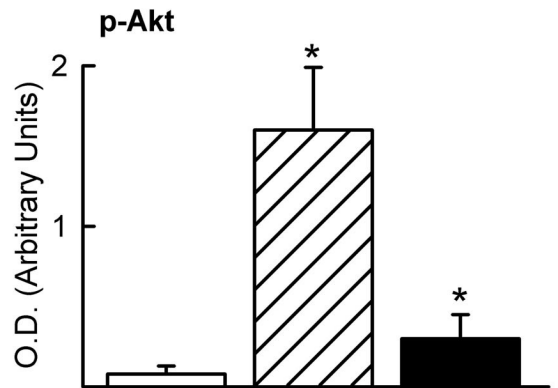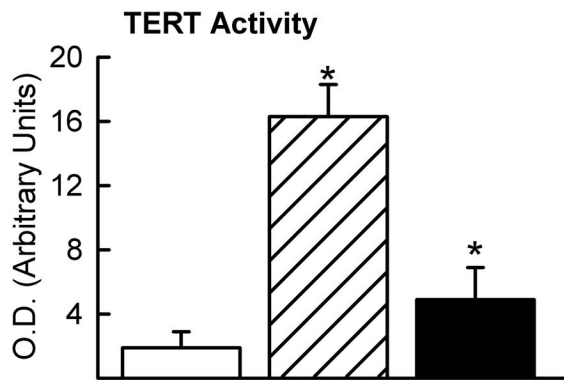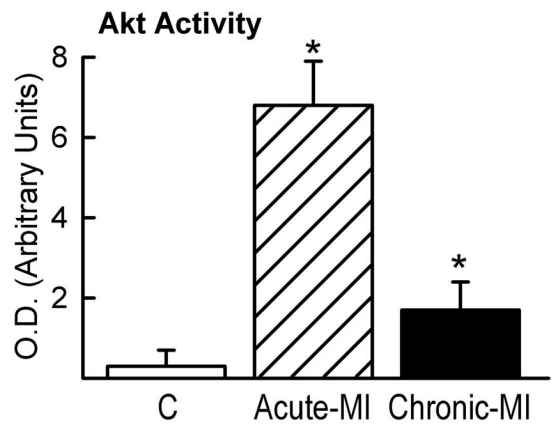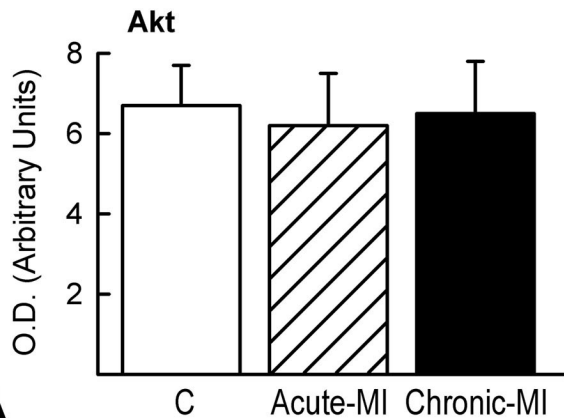

**A**

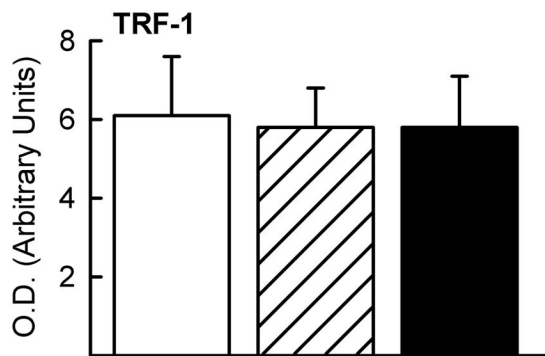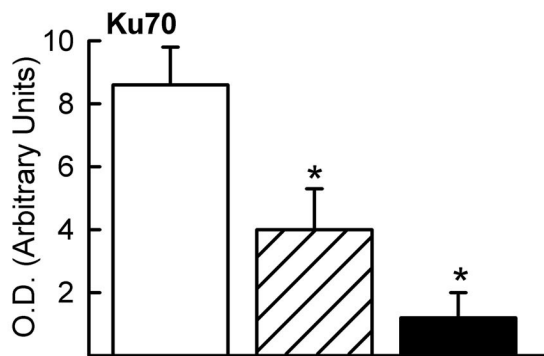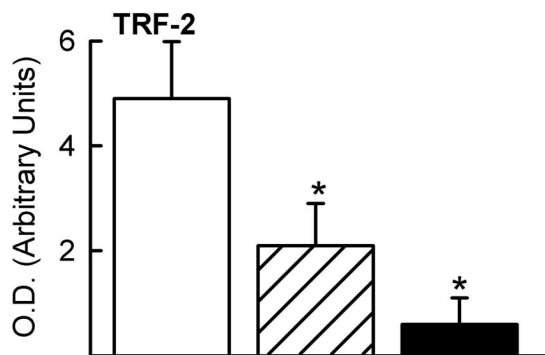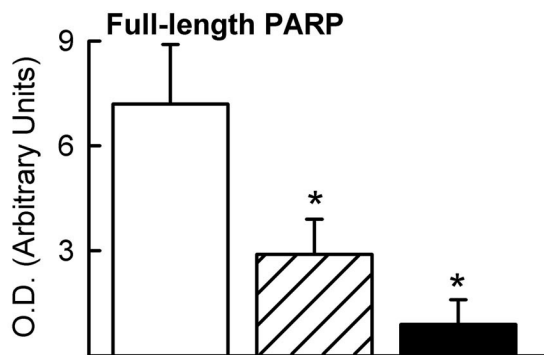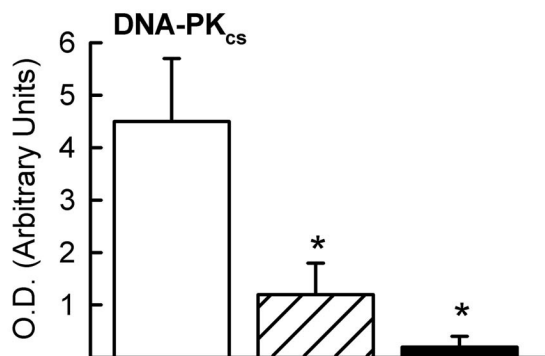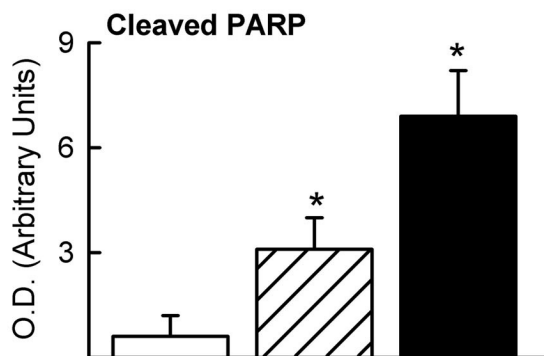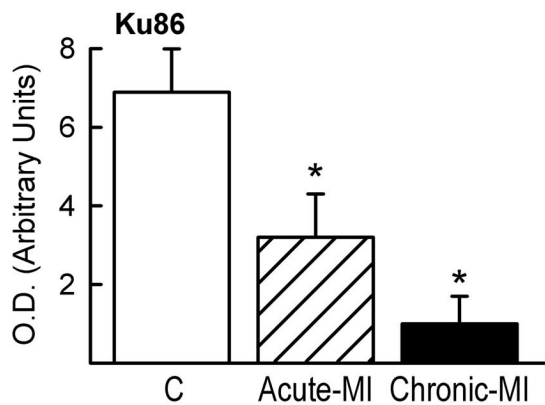

**B**

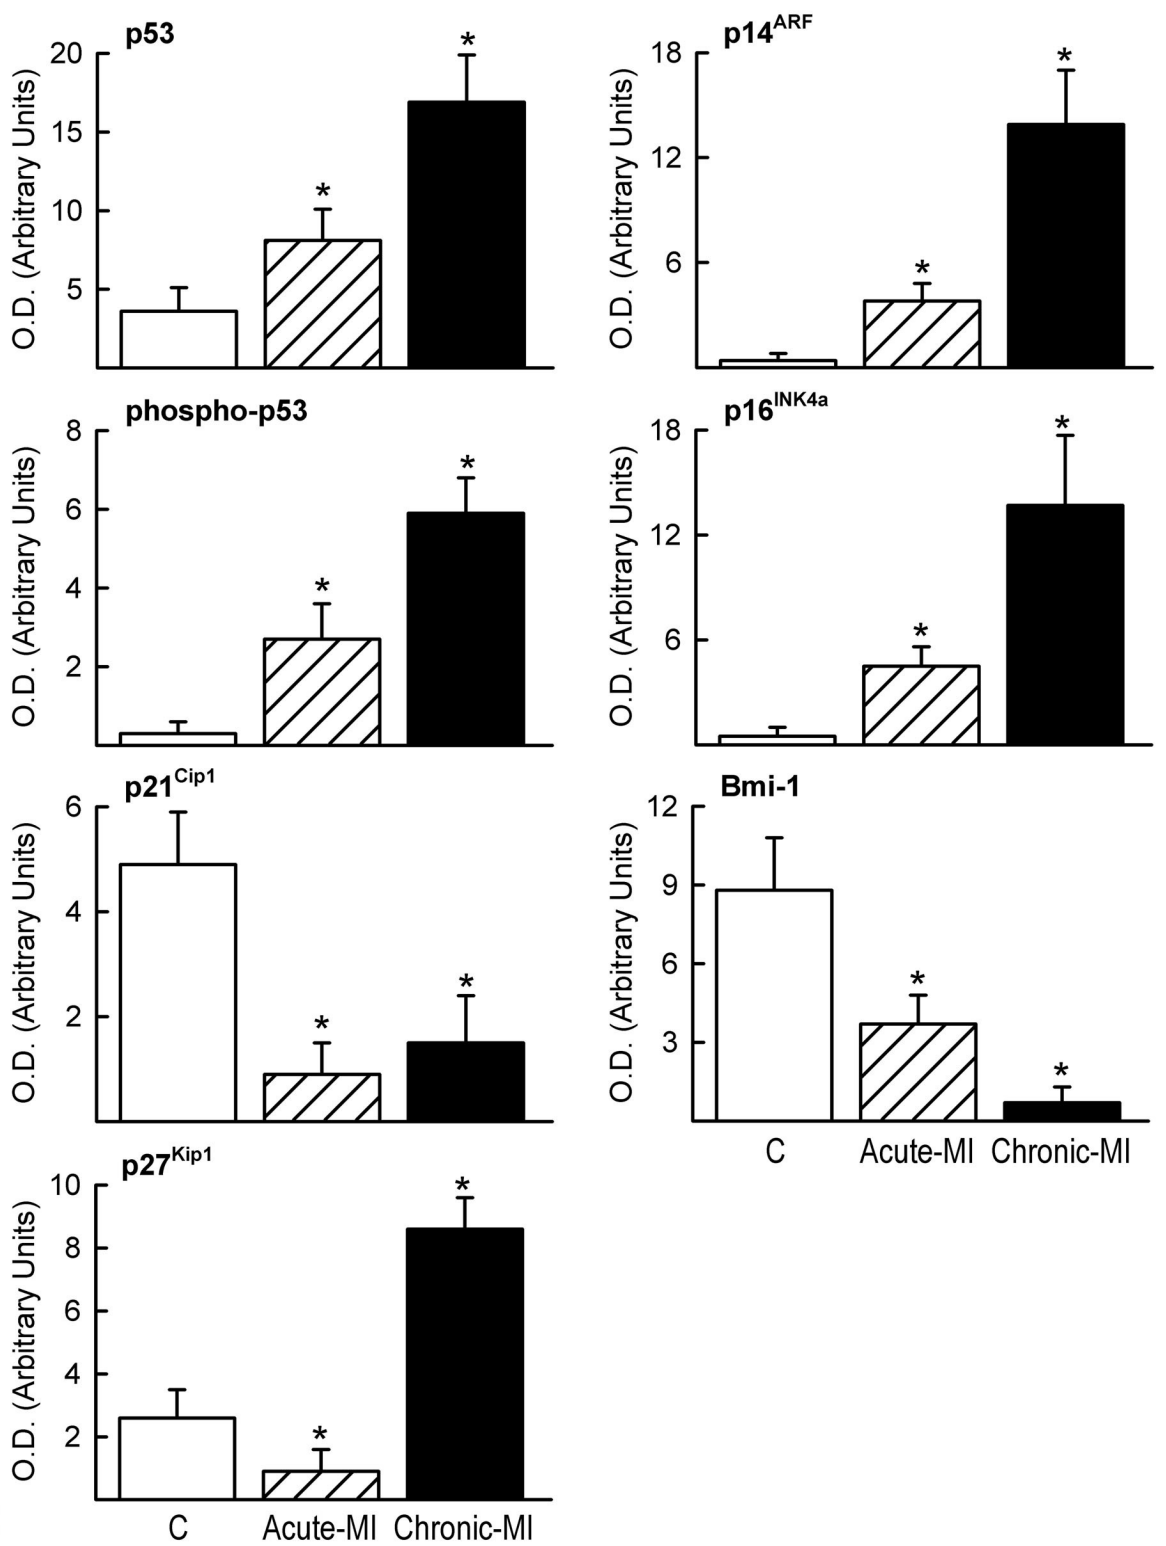

**C**

Supplement: pnas_0500169102_4.pdf [file pnas_0500169102_4.pdf]

**p16<sup>INK4a</sup> POS CSCs**

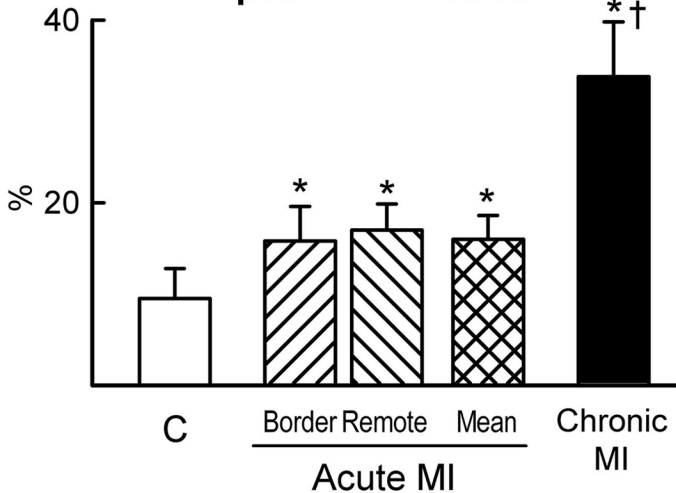

Supplement: pnas_0500169102_5.pdf [file pnas_0500169102_5.pdf]

# Distribution of Telomere Lengths in CSCs

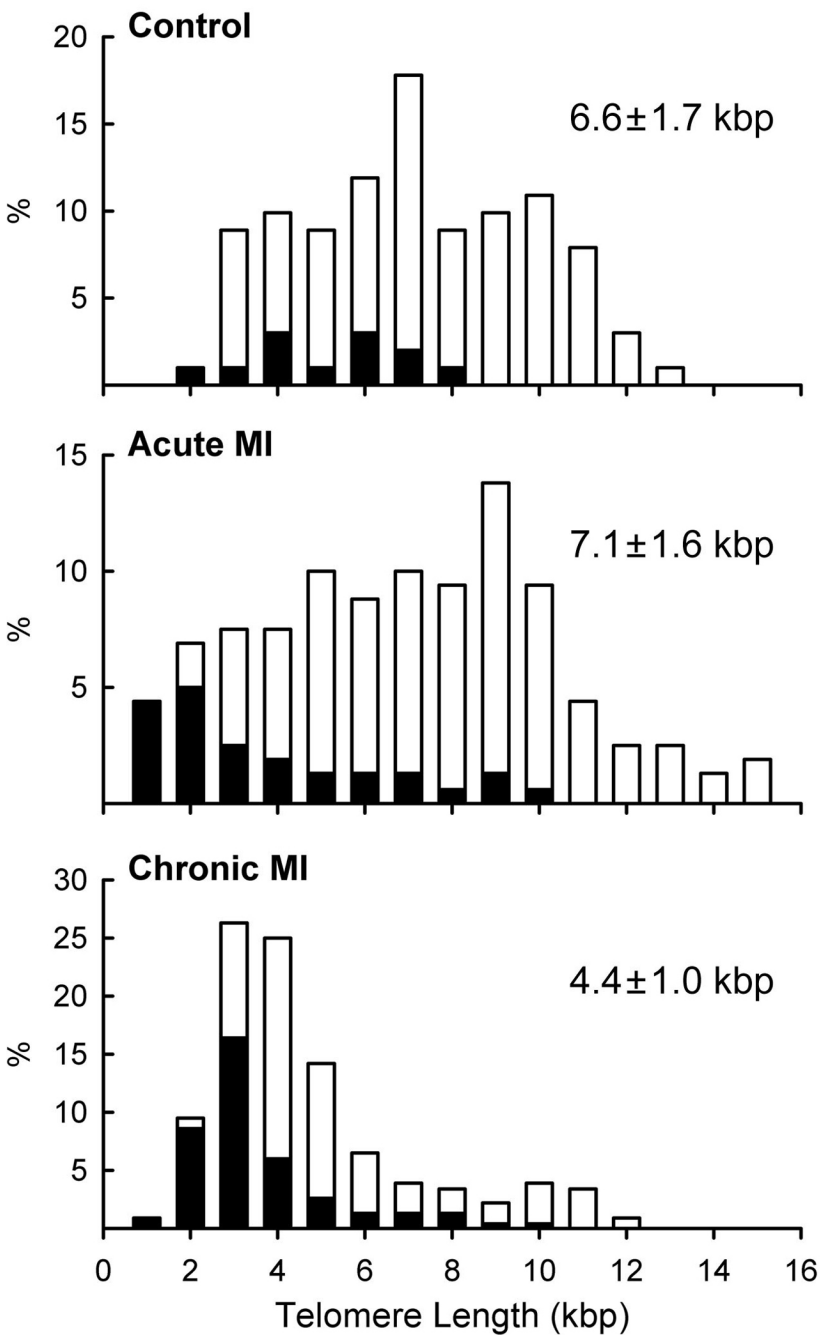

Supplement: pnas_0500169102_6.pdf [file pnas_0500169102_6.pdf]

# Apoptotic Primitive Cells

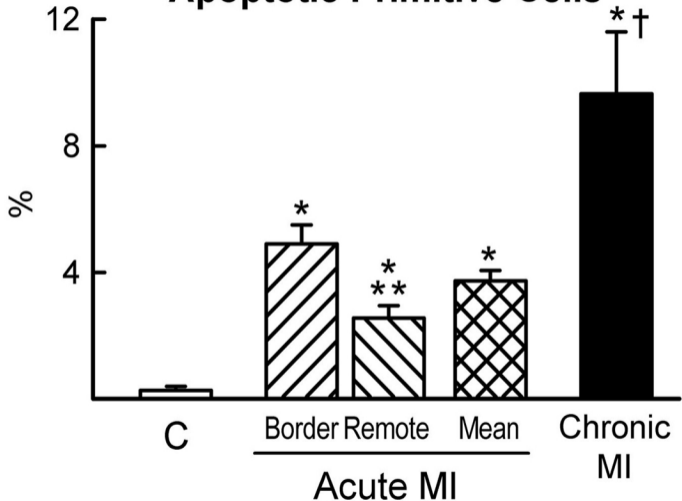

Supplement: pnas_0500169102_7.pdf [file pnas_0500169102_7.pdf]

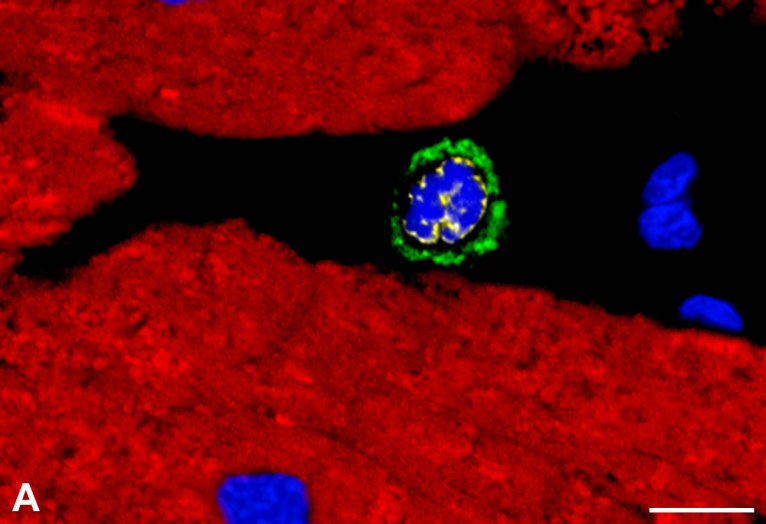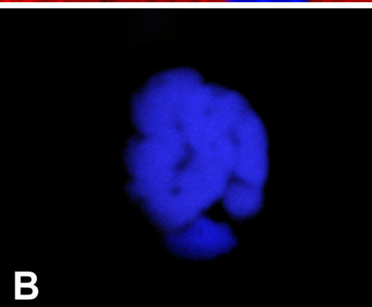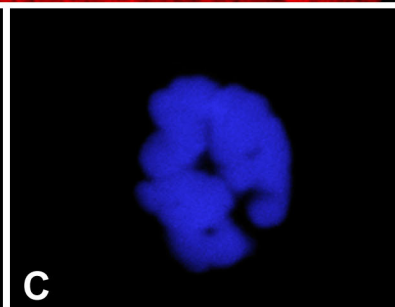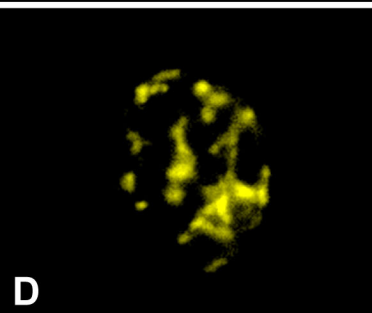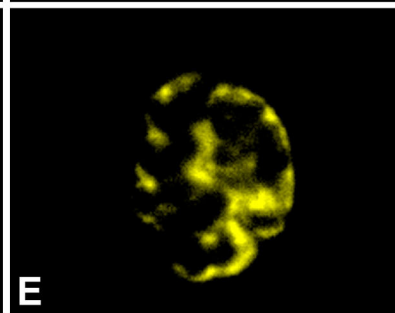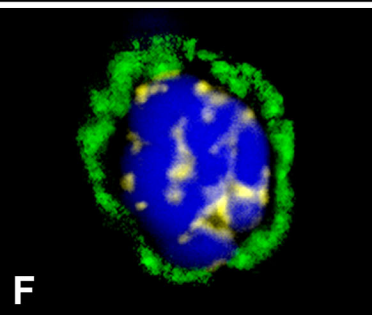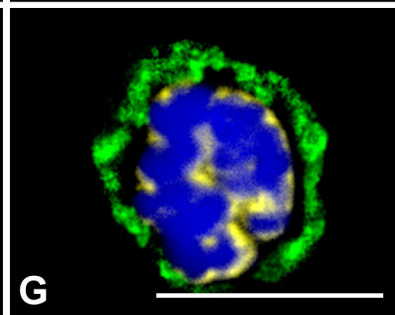

Supplement: pnas_0500169102_8.pdf [file pnas_0500169102_8.pdf]

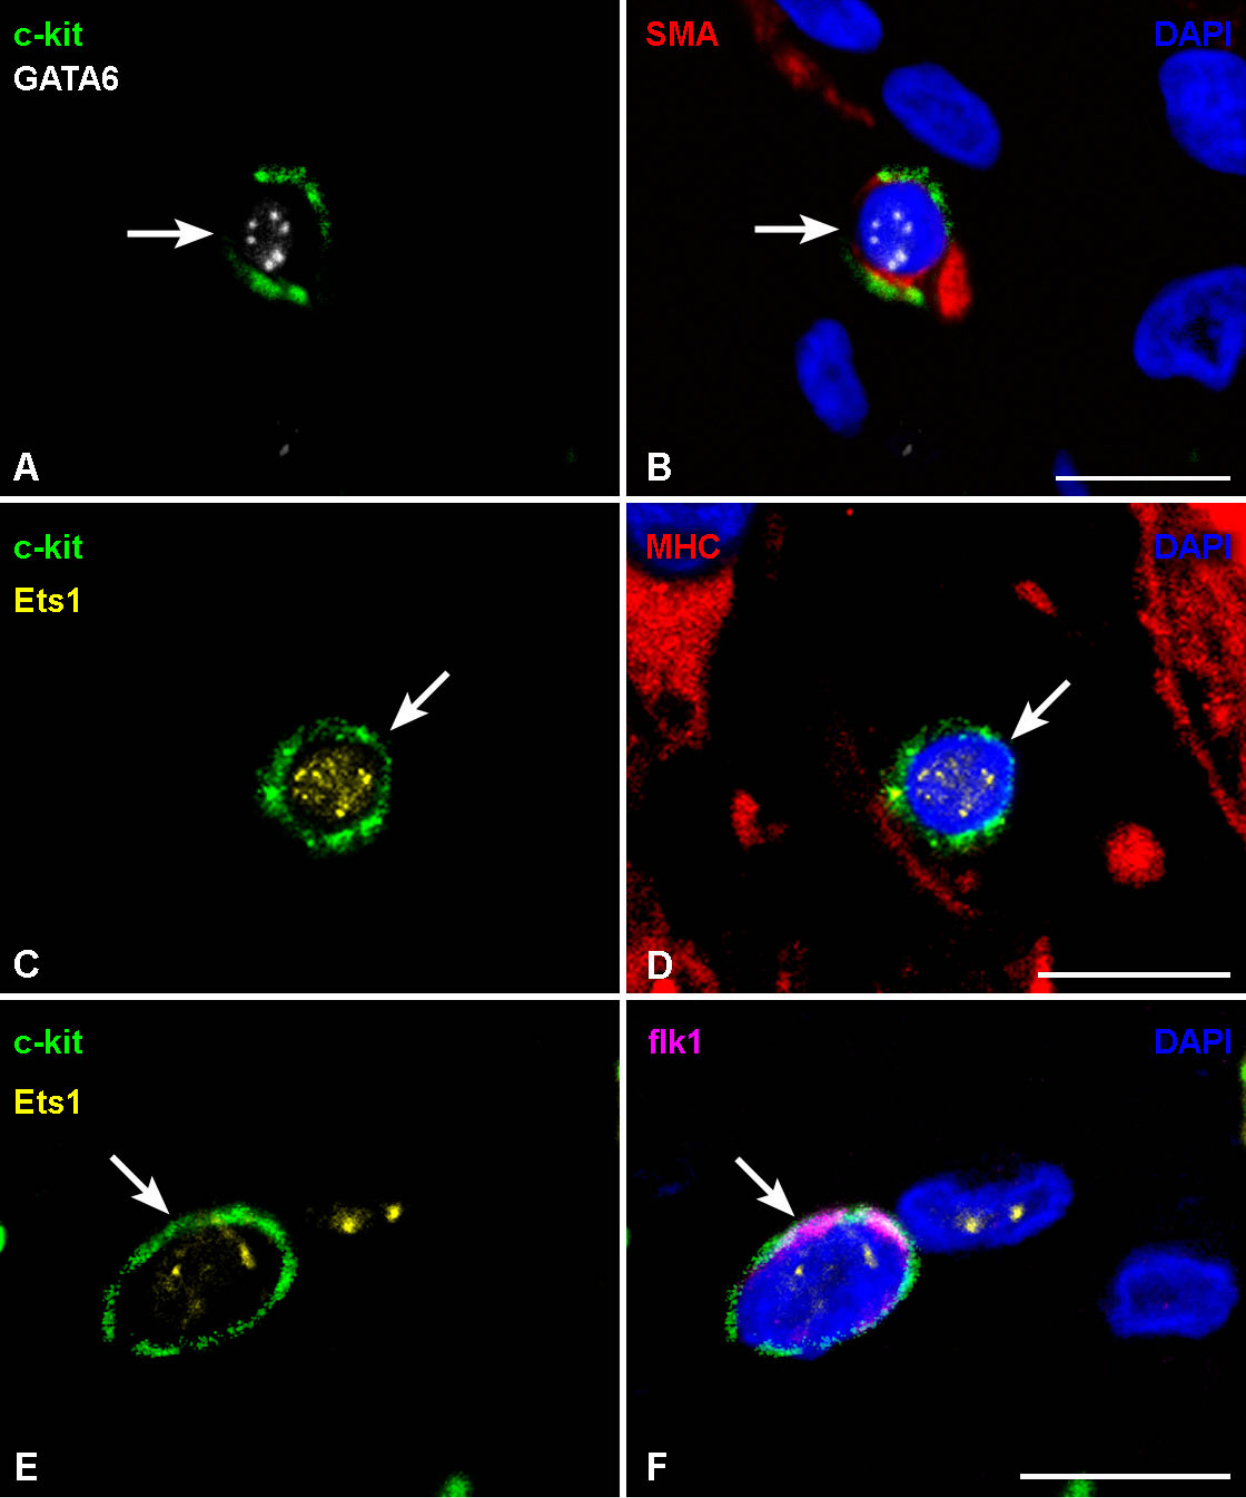

Supplement: pnas_0500169102_9.pdf [file pnas_0500169102_9.pdf]
